to be a real asset in furthering the specialty of anesthesiology in the German speaking medical world.  
H. LIVINGSTONE, M.D.

**Accepted Dental Remedies including a List of Accepted Products, together with other Information Compiled to Promote Rational Therapeutics in Dentistry.** Twenty-first edition. Paper \$2. Pp. 196. American Dental Association, 223 Superior St., Chicago 11, 1956.

This book contains little of specific interest to anesthesiologists. There are two sections, one covering "Analgesics, Sedatives, and Hypnotics" and another covering "Anesthetics." Of general interest is the fact that caution is advised throughout; for example, it is stated that the intravenous injection of barbiturates for basal anesthesia requires specialized knowledge and experience and should be administered by those with special training. A similar statement introduces the section on "General Anesthetics." To see such warnings is indeed salutary. There are some misleading expositions as, for example, the failure to include ether in the statement concerning agents that are explosive. The section on "Local Anesthetics" is a good review for the edification of dental surgeons.  
VINCENT J. COLLINS, M.D.

**Nerve Blocks. A Manual of Regional Anesthesia for Practitioners of Medicine.** BY JOHN ADRIANI, M.D., Director, Department of Anesthesiology, Charity Hospital of Louisiana, New Orleans. Cloth \$6.50. Pp. 265, with 168 illustrations. Charles C Thomas, Publisher, 301-327 E. Lawrence Ave., Springfield, Ill.; Blackwell Scientific Publications, Ltd., 24-25 Broad St., Oxford, England; Ryerson Press, 299 Queen St., W., Toronto 2B, Canada, 1954.

Dr. Adriani has separated the section on regional anesthesia from his book, "Techniques and Procedures in Anesthesia," and has expanded it into this new text. Drawing from his wide experience in teaching, he has presented the material in the same general form and style as in his "Techniques" book. To test its instructional clarity, the reviewer placed this book for reference purposes in a hospital emergency room, and it was used by both surgeons and anesthesiologists. It was found to be of practical value to both groups. Application of the techniques was readily accomplished without other reference or instruction. In subject matter it covers all of the commonly used blocks by at least one method and defines the manner in which one or a combination of blocks may be used as indicated by the specific clinical problem.

The line drawings appear to have been made by the author. The publisher has offered fine format except for disappointing reproduction of photographs. The bibliography is both accurate and adequate for this type of book. The former paucity of good regional block technique books has been amply overcome by this and several other recent publications. The particular advantage of this volume is the clear and concise style of presentation so familiar to students using Dr. Adriani's other publications.

DOUGLAS W. EASTWOOD, M.D.

**American Medical Association Scientific Exhibits 1955.** Sponsored by Council on Scientific Assembly, American Medical Association. Cloth \$20.00. Pp. 784. Grune & Stratton, Inc., 381 Fourth Ave., New York 16, 1955.

This volume consists of reproductions of approximately one-third of the Scientific Exhibits that were shown at the last Annual Meeting of the American Medical Association, including particularly those exhibits that received Awards, Certificates of Merit and Honorable Mention by the A.M.A. Committee of Awards. In addition, some exhibits that have wide appeal for practicing physicians are included.

An index at the front of the book groups the exhibits according to specialty sections. The Section on Anesthesiology appears as the second section, with 14 exhibits presented on 29 pages. The book is concluded with an alphabetical index of the authors of the exhibits.
